# Supplementary material for: Enhancing Phytate Availability in Soils and Phytate-P Acquisition by Plants: A Review
Source: PubMed Central journal article supplement — Environ Sci Technol. 2022 Jun 8;56(13):9196–219. doi: 10.1021/acs.est.2c00099 (PMC9261192; doi:10.1021/acs.est.2c00099), 2022-06-08
Supplement: es2c00099_si_001.pdf [file es2c00099_si_001.pdf]

1 **Supporting information**

2

3 **Enhancing phytate availability in soils and phytate-P acquisition by plants: a review**

4

5

6 Xue Liu,<sup>†</sup> Ran Han,<sup>‡</sup> Yue Cao,<sup>‡</sup> Benjamin L. Turner,<sup>‡</sup> Lena Q. Ma<sup>‡,\*</sup>

7

8

9 <sup>†</sup> Institute of Environment Remediation and Human Health, and College of Ecology and  
10 Environment, Southwest Forestry University, Kunming 650224, China

11 <sup>‡</sup> Institute of Soil and Water Resources and Environmental Science, College of Environmental  
12 and Resource Sciences, Zhejiang University, Hangzhou 310058, China

13 <sup>‡</sup> School of Environmental Science and Engineering, Sun Yat-sen University, Guangzhou  
14 510275, China

15

16

17 \*Corresponding author: Lena Q. Ma, [lqma@zju.edu.cn](mailto:lqma@zju.edu.cn).

18

19

20 Number of pages: 12

21 Number of tables: 3

22 Number of references: 37

23 **Table S1** Table 1 continued. (A) P<sub>o</sub> fractions (labile, microbial, chemisorbed, internal, occluded; mg kg<sup>-1</sup>) in cultivated (+P) and uncultivated (-P)  
 24 two volcanic soils (Vilcun and Osorno) and two forest watershed soils (broadleaf and coniferous) determined by sequential extraction. (B)  
 25 EDTA-extractable phytase-hydrolyzable P (EDTA-P<sub>phy</sub>) in different soil aggregates and animal wastes.

| (A)           |                                                |                                                                                        |                                                                      |                                                        |                                                                 |                                  |                |                                           |                            |                    |
|---------------|------------------------------------------------|----------------------------------------------------------------------------------------|----------------------------------------------------------------------|--------------------------------------------------------|-----------------------------------------------------------------|----------------------------------|----------------|-------------------------------------------|----------------------------|--------------------|
| Soil series   | Soil description                               | Labile P <sub>o</sub><br>(NaHCO <sub>3</sub> )                                         | Microbial P <sub>o</sub><br>(NaHCO <sub>3</sub> /CHCl <sub>3</sub> ) | Chemisorbed<br>P <sub>o</sub> (NaOH)                   | Internal P <sub>o</sub><br>(Ultrasonic<br>NaOH)                 | Occluded P <sub>o</sub><br>(HCl) | P <sub>t</sub> | Acid P <sub>o</sub><br>(%P <sub>t</sub> ) | Reference                  |                    |
| Vilcun, Chile | cultivated (+P)                                | 19                                                                                     | 25                                                                   | 1436                                                   | 703                                                             | 217                              | –              | –                                         | Hedley et al. <sup>1</sup> |                    |
|               | uncultivated (-P)                              | 13                                                                                     | 21                                                                   | 943                                                    | 673                                                             | 172                              | –              | –                                         |                            |                    |
| Osorno, Chile | cultivated (+P)                                | 85                                                                                     | 59                                                                   | 2161                                                   | 588                                                             | 41                               | –              | –                                         | Thomas et al. <sup>2</sup> |                    |
|               | uncultivated (-P)                              | 34                                                                                     | 32                                                                   | 110                                                    | 548                                                             | 26                               | –              | –                                         |                            |                    |
| Chiloé, Chile | broadleaf forest watershed                     | 69.2±6.2                                                                               | –                                                                    | 121±23.1                                               | –                                                               | –                                | 413±33         | 34.8±5.3 (54)                             | Thomas et al. <sup>2</sup> |                    |
|               | coniferous forest watershed                    | 46.3±4.4                                                                               | –                                                                    | 89.7±7.4                                               | –                                                               | –                                | 357±25         | 56.5±8.0 (54)                             |                            |                    |
| (B)           |                                                |                                                                                        |                                                                      |                                                        |                                                                 |                                  |                |                                           |                            |                    |
| Soil series   | Soil description                               | EDTA-extractable phytase hydrolyzable P (EDTA-P <sub>phy</sub> ; mg kg <sup>-1</sup> ) |                                                                      |                                                        | Aggregate size (mm) and % of bulk soil P-fraction concentration |                                  |                |                                           | Reference                  |                    |
|               |                                                | Bulk soil                                                                              |                                                                      |                                                        | >2.00                                                           | 0.50–2.00                        | 0.21–0.50      | 0.053–0.21                                | <0.053                     |                    |
| no-till (NT)  | lower nutrient erosion                         | 96.1                                                                                   |                                                                      |                                                        | 101                                                             | 109                              | 104            | 98                                        | 73                         | Green <sup>3</sup> |
| chisel-till   | mineral fertilized                             | 81.1                                                                                   |                                                                      |                                                        | 92                                                              | 105                              | 101            | 86                                        | 78                         |                    |
| organic (ORG) | moldboard plow system receiving animal manures | 72.6                                                                                   |                                                                      |                                                        | 101                                                             | 113                              | 108            | 86                                        | 84                         |                    |
| Animal wastes | P <sub>phy</sub>                               | %P <sub>t</sub>                                                                        | %P <sub>o</sub>                                                      | Experimental conditions                                |                                                                 |                                  | Enzyme         | Reference                                 |                            |                    |
|               | 169                                            | 9.4                                                                                    |                                                                      | Sequential H <sub>2</sub> O, NaHCO <sub>3</sub> , NaOH |                                                                 |                                  | a–d**          | He and Honeycutt <sup>4</sup>             |                            |                    |
|               | 698                                            |                                                                                        |                                                                      | H <sub>2</sub> O                                       |                                                                 |                                  | a              | Dao <sup>5</sup>                          |                            |                    |
| Cattle manure | 281                                            | 5.2                                                                                    | 25                                                                   | Sequential H <sub>2</sub> O, NaHCO <sub>3</sub> , NaOH |                                                                 |                                  | i              | He et al. <sup>6</sup>                    |                            |                    |
|               | 140                                            | 2.6                                                                                    | 8.7                                                                  |                                                        |                                                                 |                                  | ii             |                                           |                            |                    |
|               | 185                                            | 23.5                                                                                   | 60                                                                   | Sequential H <sub>2</sub> O, NaHCO <sub>3</sub> , NaOH |                                                                 |                                  | b, e           | He et al. <sup>7</sup>                    |                            |                    |
|               | 3811                                           | 32.2                                                                                   |                                                                      | EDTA                                                   |                                                                 |                                  | a              | Dao et al. <sup>8</sup>                   |                            |                    |
|               | 1286                                           | 18.8                                                                                   | 75                                                                   | NaOH-EDTA                                              |                                                                 |                                  | iv             | He et al. <sup>9</sup>                    |                            |                    |

|                |       |      |    |                                                        |     |      |                               |
|----------------|-------|------|----|--------------------------------------------------------|-----|------|-------------------------------|
|                | 472   | 6.7  | 95 |                                                        | v   |      |                               |
|                | 417   | 9.7  |    | H <sub>2</sub> O                                       |     | a, e |                               |
|                | 1311  | 19.7 |    | 100 mM NaOAc pH 5.0                                    |     |      |                               |
|                | 708   | 10.9 |    | 100 mM NaOAc, 50 mM EDTA                               |     |      |                               |
|                | 1436  | 27.3 |    | 1 M HCl                                                |     |      | He et al. <sup>10</sup>       |
|                | 1245  | 18.6 |    | 0.25 M NaOH, 50 mM EDTA                                |     |      |                               |
|                | 1629  | 25.8 |    | 0.5 M NaOH, 50 mM EDTA                                 |     |      |                               |
| Mean           | 1047  | 16.7 | 53 |                                                        |     |      |                               |
|                | 705   | 33.6 | 38 |                                                        |     | a-d  | He and Honeycutt <sup>4</sup> |
| Swine manure   | 486   | 10.1 | 76 | Sequential H <sub>2</sub> O, NaHCO <sub>3</sub> , NaOH | iii | a-d  | He et al. <sup>6</sup>        |
|                | 277   | 5.8  | 20 |                                                        |     |      |                               |
| Mean           | 360   | 13.2 | 23 |                                                        |     | b, e | He et al. <sup>11</sup>       |
|                | 457   | 15.7 | 39 |                                                        |     |      |                               |
|                | 2198  | 16.3 | 84 | NaOH-EDTA                                              | iv  | a-d  | He et al. <sup>9</sup>        |
|                | 2171  | 17.5 | 83 |                                                        | v   |      |                               |
|                | 218   | 4.5  |    | H <sub>2</sub> O                                       |     | a, e | He et al. <sup>10</sup>       |
|                | 573   | 7.5  |    | 100 mM NaOAc pH 5.0                                    |     |      |                               |
| Poultry manure | 2153  | 16.2 |    | 100 mM NaOAc, 50 mM EDTA                               |     |      |                               |
|                | 4209  | 29.0 |    | 1 M HCl                                                |     |      |                               |
|                | 2970  | 22.1 |    | 0.25 M NaOH, 50 mM EDTA                                |     |      |                               |
|                | 3727  | 26.0 |    | 0.5 M NaOH, 50 mM EDTA                                 |     |      |                               |
| Mean           | 2277  | 17.4 | 84 |                                                        |     |      |                               |
|                | 170   | 5.3  |    | H <sub>2</sub> O                                       |     | a, e | He et al. <sup>10</sup>       |
|                | 8258  | 63.3 |    | 100 mM NaOAc pH 5.0                                    |     |      |                               |
| Poultry litter | 10140 | 65.5 |    | 100 mM NaOAc, 50 mM EDTA                               |     |      |                               |
|                | 9710  | 64.2 |    | 1 M HCl                                                |     |      |                               |
|                | 11085 | 70.7 |    | 0.25 M NaOH, 50 mM EDTA                                |     |      |                               |
|                | 11091 | 70.7 |    | 0.5 M NaOH, 50 mM EDTA                                 |     |      |                               |
| Mean           | 8409  | 56.6 |    |                                                        |     |      |                               |

26 \*\* (a) *Aspergillus ficuum* phytase, (b) wheat phytase, (c) wheat germ acid phosphatase, (d) Bovine intestinal mucosa alkaline phosphatase and (e) Potato acid  
27 phosphatase, (i) Fresh, (ii) after one year storage 22°C, (iii) after one year storage 4°C (iv) wet and (v) dry.<sup>12</sup>

28 **Table S2** Table 3A continued. Summary of known plant secreted organic acids to mobilize soil P.

| Plant family/species                 | Location and soil P (mg kg <sup>-1</sup> ) |                |                 |                    | Total carboxylates<br>( $\mu\text{mol g}^{-1}$ root dw) | Root organic acid species<br>and %Total carboxylates |           | Reference                       |
|--------------------------------------|--------------------------------------------|----------------|-----------------|--------------------|---------------------------------------------------------|------------------------------------------------------|-----------|---------------------------------|
|                                      | Location                                   | P <sub>t</sub> | bicarb.-extr. P | P retention index* |                                                         | citric                                               | malic     |                                 |
| field pea ( <i>Pisum sativum</i> )   | Bindoon                                    | 133            | 5               | 33.8               | 1.5–5                                                   | 74–98                                                |           |                                 |
|                                      | Mingenew                                   | 119            | 9               | 58.1               | 12.5–15                                                 | 98                                                   | –         |                                 |
|                                      | Nyabing                                    | 70             | 6.5             | 7.2                | 25–50                                                   | 97–99                                                |           |                                 |
| white lupin ( <i>Lupinus albus</i> ) | Bindoon                                    |                |                 |                    | 15–18.8                                                 | 62.5–87.5                                            | 18.8–43.8 | Nuruzzaman et al. <sup>12</sup> |
|                                      | Mingenew                                   |                |                 |                    | 18.8–25                                                 | 50                                                   | 56.3      |                                 |
|                                      | Nyabing                                    |                |                 |                    | 37.5–50                                                 | 68.8–74.4                                            | 37.5      |                                 |
| faba bean ( <i>Vicia faba</i> )      | Bindoon                                    |                |                 |                    | 2–5                                                     |                                                      |           |                                 |
|                                      | Mingenew                                   | –              | –               | –                  | 2.75–9.75                                               | –                                                    | –         |                                 |
|                                      | Nyabing                                    |                |                 |                    | 6.25–14.5                                               |                                                      |           |                                 |
| wheat ( <i>Triticum aestivum</i> )   | Bindoon                                    |                |                 |                    | 0–2.25                                                  |                                                      |           |                                 |
|                                      | Mingenew                                   |                |                 |                    | 5–12.5                                                  | –                                                    | –         |                                 |
|                                      | Nyabing                                    |                |                 |                    | 7.5–10                                                  |                                                      |           |                                 |

  

| Plant family/species                          | Root organic acid species | Organic acid concentration |                             | P-mobilizing capacity |                                             |                  |        | Reference                           |
|-----------------------------------------------|---------------------------|----------------------------|-----------------------------|-----------------------|---------------------------------------------|------------------|--------|-------------------------------------|
|                                               |                           | mmol g <sup>-1</sup> root  | $\mu\text{mol g}^{-1}$ soil | Soil initial P        | Soil mobilized P ( $\mu\text{mol g}^{-1}$ ) |                  |        |                                     |
| Fabaceae                                      |                           |                            |                             |                       | H <sub>2</sub> O-extr. <sup>b</sup>         | CAL <sup>c</sup> | Olsen  | Soil solution (mg L <sup>-1</sup> ) |
| <i>Lupinus albus</i> L.                       |                           | 0.24 fw                    | 47.7                        |                       |                                             |                  | >5.5   |                                     |
|                                               |                           | 8.8–22.1 fw                | 47.7±7.2                    |                       | 61±7                                        | 581±76           | 484±68 | 12.5                                |
| <i>Lupinus angustifolius</i>                  | citric                    | 60 dw                      |                             | –                     |                                             |                  |        |                                     |
| <i>Lupinus consentinii</i>                    |                           | 85 dw                      | –                           |                       |                                             |                  |        | White and Robson <sup>15</sup>      |
| pea ( <i>Pisum sativum</i> )                  |                           | 90 dw                      |                             |                       |                                             |                  |        |                                     |
| pigeon pea ( <i>Cajanus cajan</i> L. Millsp.) | piscidic                  |                            |                             | Fe-bound P            |                                             |                  |        | Dao <sup>16</sup>                   |

| Plant family/species                        | Root organic acid species                 | Organic acid efflux                          |                                                 | Reference                                                                                      |                                 |
|---------------------------------------------|-------------------------------------------|----------------------------------------------|-------------------------------------------------|------------------------------------------------------------------------------------------------|---------------------------------|
|                                             |                                           | nmol g <sup>-1</sup> fw h <sup>-1</sup>      | units shown                                     |                                                                                                |                                 |
| <i>Brassica napus</i>                       | malic                                     | 200                                          | 0.43 nmol cm <sup>-1</sup> root h <sup>-1</sup> | Hoffland et al. <sup>17</sup>                                                                  |                                 |
|                                             | citric                                    | 70                                           | 0.14                                            |                                                                                                |                                 |
| rice                                        | citric                                    | 337                                          |                                                 | Kirk et al. <sup>18</sup>                                                                      |                                 |
| <i>Lupinus albus</i>                        | citric                                    | 570, 1160, 2380                              |                                                 | Johnson et al., <sup>19</sup> Neumann et al., <sup>14</sup> Keerthisinghe et al. <sup>20</sup> |                                 |
|                                             | malic                                     | 510, 130                                     |                                                 |                                                                                                |                                 |
| <i>Alfalfa</i>                              | citric                                    | 3.5                                          |                                                 | Lipton et al. <sup>21</sup>                                                                    |                                 |
| maize                                       | malic                                     | 430                                          |                                                 | Jones and Darrah <sup>22</sup>                                                                 |                                 |
|                                             | citric                                    | 90                                           |                                                 |                                                                                                |                                 |
| wheat                                       | malic                                     | 4000                                         | 2 nmol apex <sup>-1</sup> h <sup>-1</sup>       | Ryan et al. <sup>23</sup>                                                                      |                                 |
| maize                                       |                                           | 55                                           | 0.25                                            | Pellet et al. <sup>24</sup>                                                                    |                                 |
| tobacco                                     | citric                                    | 240                                          | 0.18                                            | Delhaize et al. <sup>25</sup>                                                                  |                                 |
| chickpea                                    | malonic                                   |                                              | 2 nmol plant <sup>-1</sup> h <sup>-1</sup>      | Ohwaki and Sugahara <sup>26</sup>                                                              |                                 |
|                                             | tartaric                                  |                                              | 0.4                                             |                                                                                                |                                 |
|                                             | citric                                    |                                              | 0.4                                             |                                                                                                |                                 |
|                                             | fumaric                                   |                                              | 0.4                                             |                                                                                                |                                 |
| Harsh hakea ( <i>Hakea prostrata</i> R.Br.) |                                           | mmol g <sup>-1</sup> fw s <sup>-1</sup>      |                                                 | Shane et al. <sup>27</sup>                                                                     |                                 |
|                                             | malic                                     | 0.05–0.34                                    |                                                 |                                                                                                |                                 |
|                                             | citric                                    | 0.01–0.04                                    |                                                 |                                                                                                |                                 |
|                                             | cis-aconitic                              | 0–0.04                                       |                                                 |                                                                                                |                                 |
|                                             | trans-aconitic                            | 0–0.17                                       |                                                 |                                                                                                |                                 |
|                                             | lactic                                    | 0–0.13                                       |                                                 |                                                                                                |                                 |
| Plant species                               |                                           | P-mobilizing capacity (mg kg <sup>-1</sup> ) |                                                 | Reference                                                                                      |                                 |
| Buckwheat ( <i>Fagopyrum esculentum</i> )   | Al-P                                      | Fe-P                                         | Ca-P                                            | labile-P                                                                                       | Teboh and Franzen <sup>28</sup> |
|                                             | spring wheat ( <i>Triticum aestivum</i> ) |                                              | 121-126                                         |                                                                                                |                                 |
| ruzigrass ( <i>Urochloa ruziziensis</i> )   | 0.00–0.05                                 | 363-484                                      | anion exchange resin (AER)                      | Almeida and Rosolem <sup>29</sup>                                                              |                                 |
|                                             | 0.05–0.10                                 | 385-465                                      | NaHCO <sub>3</sub> -extr.                       |                                                                                                |                                 |

- 30 \* Phosphorus retention index, was estimated as the ratio between sorbed P and solution P after equilibration of 2.5 g soil with 50 mL of 0.02 M KCl containing 10 mg  
31  $L^{-1} P$ .<sup>13</sup>
- 32 <sup>b</sup> bicarb.-extr. = bicarbonate-extractable; extr. = extractable. Bicarbonate-extractable P is extracted with 0.5 M sodium bicarbonate at pH 8.5.<sup>13</sup>
- 33 <sup>c</sup> CAL-0.13 mmol calcium acetate lactate extractable P  $kg^{-1}$  soil.<sup>31</sup>

34 **Table S3** Transgenic plant or yeast, phytase genes source and the expressed phytase activity and properties.

| Transgenic plant                                | Phytase gene source                          | Gene sequence                                                                                                                  | Specific activity                                  |                       | pH optim.                                                                                      | Temp. optim. (°C)            | K <sub>m</sub> (μM)                    | Catalytic efficiency K <sub>cat</sub> (s <sup>-1</sup> )              | Thermal stability                          | M <sub>w</sub> (kDa)        | Reference                  |
|-------------------------------------------------|----------------------------------------------|--------------------------------------------------------------------------------------------------------------------------------|----------------------------------------------------|-----------------------|------------------------------------------------------------------------------------------------|------------------------------|----------------------------------------|-----------------------------------------------------------------------|--------------------------------------------|-----------------------------|----------------------------|
|                                                 |                                              |                                                                                                                                | U mg <sup>-1</sup>                                 | μKat mg <sup>-1</sup> |                                                                                                |                              |                                        |                                                                       |                                            |                             |                            |
| Potato ( <i>Solanum tuberosum</i> )             | <i>Aspergillus ficuum</i> ( <i>niger</i> )   | initiation codon: 5'-GCGTCTAGATGCTGG CAGTCCCCGCCTC-3                                                                           | 180                                                | 3                     | 5.0                                                                                            | 58                           | 124                                    |                                                                       |                                            | 67.5–81.6                   | Ullah et al. <sup>30</sup> |
| Soybean ( <i>Glycine max</i> )                  | <i>Aspergillus niger</i>                     | Upstream oligonucleotide: 5'-GCGTCTAGACTGGCA GTCCCCGCCTCG-3'<br>downstream oligonucleotide: 5'-TGCTCTAGACTAAGC AAAA CACTCCG-3' | 55.2                                               | 0.92                  | 58°C (pH 3.0, 5.5),<br>63°C (pH 5.0),<br>66°C (pH 4.5),<br>highest activity at 63°C and pH 5.0 |                              |                                        |                                                                       |                                            | 69–71                       | Li et al. <sup>31</sup>    |
| Tobacco ( <i>Nicotiana tabacum</i> L. cv. NC89) | <i>Agrobacterium tumefaciens</i> LBA4404     | The gene sequence <i>phyAI</i> was shown on the record as GenBank Accession: AY013315.                                         |                                                    |                       | 2.0, 5.5                                                                                       | 50                           | 730 (Na-phytate),<br>1300 (Ca-phytate) | 1.2×10 <sup>4</sup> (Na-phytate),<br>5.1×10 <sup>3</sup> (Ca-phytate) | 25.1% residual activity at 80°C for 15 min | 76                          | Zhang et al. <sup>32</sup> |
| Alfalfa ( <i>Medicago sativa</i> )              | <i>Aspergillus ficuum</i>                    |                                                                                                                                | 226                                                | 3.76                  | 5.0                                                                                            | 58                           | 50                                     |                                                                       | Inactivated completely at 68°C             | 73–100                      | Ullah et al. <sup>33</sup> |
| Transgenic plant or yeast                       | Phytase gene source                          | Gene sequence                                                                                                                  | Specific activity                                  |                       | pH optim.                                                                                      | Temp. optim. (°C)            |                                        | Thermal stability                                                     | M <sub>w</sub> (kDa)                       | Reference                   |                            |
| Rice ( <i>Oryza sativa</i> )                    | Yeast ( <i>Schwanniomyces occidentalis</i> ) | full-length codon-modified phytase                                                                                             | 4.6 U <sup>a</sup> g <sup>-1</sup> fw <sup>b</sup> |                       | pH 4.5 determined at 37°C                                                                      | 70°C determined at pH 5.5    |                                        | lost 32% and 92% activity at 80°C and 90°C                            | 70                                         | Hamada et al. <sup>34</sup> |                            |
|                                                 |                                              | truncated codon-modified phytase                                                                                               | 10.6 U g <sup>-1</sup> fw                          |                       | pH 5.0 determined at 37°C                                                                      | 50–60°C determined at pH 5.5 |                                        | lost 87% and 94% activity at 70°C and 80°C                            |                                            |                             |                            |

|                                                 |                           |                                                         |                                     |              |       |                  |     |                             |
|-------------------------------------------------|---------------------------|---------------------------------------------------------|-------------------------------------|--------------|-------|------------------|-----|-----------------------------|
|                                                 | <i>Peniophora lycii</i>   |                                                         | 1080±110 U mg <sup>-1</sup> protein | 4.0–4.5      | 50–55 | 62% <sup>c</sup> | 72  |                             |
|                                                 | <i>Agrocybe pediades</i>  | http://www.expasy.ch/cgi-bin/get-prodoc-entry?PDOC00538 | 400                                 | 5.0–6.0      | 50    | 47%              | 59  |                             |
| Yeast ( <i>Aspergillus oryzae</i> ) A1560       | <i>Ceriporia</i> sp. 1    |                                                         | 700±80                              | 5.5–6.0      | 55–60 | 38%              | 59  | Lassen et al. <sup>35</sup> |
|                                                 | <i>Ceriporia</i> sp. 2    | grouped as 6-phytases (EC 3.1.3.26)                     | 1040±310                            | 5.0–6.0      | 40–45 | 22%              | 54  |                             |
|                                                 | <i>Trametes pubescens</i> |                                                         | 1210±30                             | 5.0–5.5      | 50    | 15%              | 62  |                             |
|                                                 | <i>Aspergillus niger</i>  |                                                         | 100                                 | 2.5–5.5      | 50    | 52%              | –   |                             |
| Saccharomyces cerevisiae                        | <i>Aspergillus niger</i>  | –                                                       | 4.0 U mg <sup>-1</sup>              | 2–2.5, 5–5.5 | 55–60 | –                | 120 |                             |
| Methylotrophic yeast ( <i>Pichia pastoris</i> ) | <i>Aspergillus niger</i>  | –                                                       | 25–65 U mL <sup>-1</sup>            | 2.5, 5.5     | 60    | –                | 95  | Han et al. <sup>36</sup>    |

| Transgenic plant                 | Phytase gene source      | Gene sequence                                                                                            | Transgenic lines                                             | Phytase expression (FTU g <sup>-1</sup> ) |         | M <sub>w</sub> (kDa) | Reference                 |
|----------------------------------|--------------------------|----------------------------------------------------------------------------------------------------------|--------------------------------------------------------------|-------------------------------------------|---------|----------------------|---------------------------|
|                                  |                          |                                                                                                          |                                                              | Average                                   | Highest |                      |                           |
| Canola ( <i>Brassica napus</i> ) | <i>Aspergillus niger</i> | two oligos:<br>5'AGGATCCATGGACTTGAAATCTTTCC CATTTC3';<br>5'ACGAGCTCTTAAGCAAAGCATTTCAGC CCAATCA<br>CCAC3' | Native phytase without KDEL <sup>d</sup> (n <sup>e</sup> =8) | 7.6                                       | 15      | 70                   | Peng et al. <sup>37</sup> |
|                                  |                          |                                                                                                          | Codon-modified phytase without KDEL (K0) (n=32)              | 8.8                                       | 21      |                      |                           |
|                                  |                          |                                                                                                          | Native phytase with KDEL (n=26)                              | 10.3                                      | 24      |                      |                           |
|                                  |                          |                                                                                                          | Codon-modified phytase with KDEL (MPHY2) (n=103)             | 15.6                                      | 41      |                      |                           |

35 <sup>a</sup> One unit (U, μmol mg<sup>-1</sup>) of phytase activity was defined as the amount of phytase required to hydrolyze sodium phytate to produce 1 μmol P per min at 37°C and  
36 pH 5.5.<sup>34,36</sup>

37 <sup>b</sup> fw = fresh weight.

38 <sup>c</sup> Residual activities were measured after preincubation of the enzymes for 60 min at 80°C in 0.1 M sodium acetate, pH 5.5 (Lassen et al., 2001).



39 <sup>d</sup> KDEL=Lys-Asp-Glu-Leu.

40 <sup>e</sup> n = number of transgenic tested.

41 <sup>f</sup> KDEL=Lys-Asp-Glu-Leu.

42 <sup>g</sup> n = number of transgenic tested.

43 **References**

- 44 (1) Hedley, M. J.; Stewart, J. W. B.; Chauhan, B. S. Changes in inorganic and organic soil  
45 phosphorus fractions induced by cultivation practices and by laboratory incubations. *Soil*  
46 *Sci. Soc. Am. J.* **1982**, *46*, 970–976.
- 47 (2) Thomas, S. M.; Johnson, A. H.; Frizano, J.; Vann, D. R.; Zarin, D. J.; Joshi, A.  
48 Phosphorus fractions in montane forest soils of the Cordillera de Piuchué, Chile:  
49 biogeochemical implications. *Plant Soil* **1999**, *211*, 139–148.
- 50 (3) Steven Green, V.; Dao, T. H.; Cavigelli, M. A.; Flanagan, D. C. Phosphorus fractions and  
51 dynamics among soil aggregate size classes of organic and conventional cropping  
52 systems. *Soil Sci.* **2006**, *171*, 874–885.
- 53 (4) He, Z.; Honeycutt, C. W. Enzymatic characterization of organic phosphorus in animal  
54 manure. *J. Environ. Qual.* **2001**, *30*, 1685–1692.
- 55 (5) Dao, T. H. Polyvalent cation effects on myo-inositol hexakis dihydrogenphosphate  
56 enzymatic dephosphorylation in dairy wastewater. *J. Environ. Qual.* **2003**, *32*, 694–701.
- 57 (6) He, Z.; Honeycutt, C. W.; Griffin, T. S. Enzymatic hydrolysis of organic phosphorus in  
58 extracts and resuspensions of swine manure and cattle manure. *Biol. Fertil. Soils* **2003**,  
59 *38*, 78–83.
- 60 (7) He, Z.; Toor, G. S.; Honeycutt, C. W.; Sims, J. T. An enzymatic hydrolysis approach for  
61 characterizing labile phosphorus forms in dairy manure under mild assay conditions.  
62 *Bioresour. Technol.* **2006**, *97*, 1660–1668.
- 63 (8) Dao, T. H.; Lugo-Ospina, A.; Reeves, J.; Zhang, H. Wastewater chemistry and  
64 fractionation of bioactive phosphorus in dairy manure. *Commun. Soil Sci. Plant Anal.*  
65 **2006**, *37*, 907–924.
- 66 (9) He, Z.; Cade-Menun, B. J.; Toor, G. S.; Fortuna, A. M.; Honeycutt, C. W.; Sims, J. T.  
67 Comparison of phosphorus forms in wet and dried animal manures by solution  
68 phosphorus-31 nuclear magnetic resonance spectroscopy and enzymatic hydrolysis. *J.*  
69 *Environ. Qual.* **2007**, *36*, 1086.
- 70 (10) He, Z. Q.; Waldrip, H. W.; Honeycutt, C. W.; Erich, M. S.; Senwo, Z. N. Enzymatic  
71 quantification of phytate in animal manure. *Comm. Soil Sci. Plant Ana.* **2009**, *40*, 566–  
72 575.
- 73 (11) He, Z.; Griffin, T. S.; Honeycutt, C. W. Evaluation of soil phosphorus transformations by  
74 sequential fractionation and phosphatase hydrolysis. *Soil Sci.* **2004**, *169*, 515–527.
- 75 (12) Nuruzzaman, M.; Lambers, H.; Bolland, M. D. A.; Veneklaas, E. J. Phosphorus benefits  
76 of different legume crops to subsequent wheat grown in different soils of Western  
77 Australia. *Plant Soil* **2005**, *271*, 175–187.
- 78 (13) B., D.; C., H.; H., M. Distribution and function of proteoid roots and other root clusters.

- 79 *Bot. Acta* **1995**, *108*, 183–200.
- 80 (14) Neumann, G.; Massonneau, A.; Martinoia, E.; Rmheld, V. Physiological adaptations to  
81 phosphorus deficiency during proteoid root development in white lupin. *Planta* **1999**,  
82 *208*, 373–382.
- 83 (15) White, P. F.; Robson, A. D. Rhizosphere acidification and Fe<sup>3+</sup> reduction in lupins and  
84 peas: Iron deficiency in lupins is not due to a poor ability to reduce Fe<sup>3+</sup>. *Plant Soil* **1989**,  
85 *119*, 163–175.
- 86 (16) Dao, T. Ligand effects on inositol phosphate solubility and bioavailability in animal  
87 manures. In B. L. Turner, A. E. Richardson, and E. J. Mullaney (Eds.), *Inositol*  
88 *phosphates: Linking agriculture and the environment*. CABI, Cambridge, MA, USA **2007**,  
89 169–185.
- 90 (17) Hoffland, E.; Findenegg, G. R.; Nelemans, J. A. Solubilization of rock phosphate by rape.  
91 *Plant Soil* **1989**, *113*, 161–165.
- 92 (18) Kirk, G. J. D.; Santos, E. E.; Findenegg, G. R. Phosphate solubilization by organic anion  
93 excretion from rice (*Oryza sativa* L.) growing in aerobic soil. *Plant Soil* **1999**, *211*, 11–  
94 18.
- 95 (19) Johnson, J. F. Root carbon dioxide fixation by phosphorus-deficient *Lupinus albus*. *Plant*  
96 *Physiol.* **1996**, *112*, 19–30.
- 97 (20) Keerthisinghe, G.; Hocking, P. J.; Ryan, P. R.; Delhaize, E. Effect of phosphorus supply  
98 on the formation and function of proteoid roots of white lupin (*Lupinus albus* L.). *Plant*  
99 *Cell Environ.* **1998**, *21*, 467–478.
- 100 (21) Lipton, D. S.; Blevins, B. D. G. Citrate, malate, and succinate concentration in exudates  
101 from P-sufficient and P-stressed *Medicago sativa* L. seedlings. *Plant Physiol.* **1987**, *85*,  
102 315–317.
- 103 (22) Jones, D. L.; Darrah, P. R. Influx and efflux of organic acids across the soil–root  
104 interface of *Zea mays* L. and its implications in rhizosphere C flow. *Plant Soil* **1995**, *173*,  
105 103–109.
- 106 (23) Ryan, P. R.; Delhaize, E.; Randall, P. J. Characterisation of Al-stimulated efflux of  
107 malate from the apices of Al-tolerant wheat roots. *Planta* **1995**, *196*, 103–110.
- 108 (24) Pellet, D. M.; Grunes, D. L.; Kochian, L. V. Organic acid exudation as an aluminum-  
109 tolerance mechanism in maize (*Zea mays* L.). *Planta* **1995**, *196*, 788–795.
- 110 (25) Delhaize, E.; Hebb, D. M.; Ryan, P. R. Expression of a *Pseudomonas aeruginosa* citrate  
111 synthase gene in tobacco is not associated with either enhanced citrate accumulation or  
112 efflux. *Plant Physiol.* **2001**, *125*, 2059–2067.
- 113 (26) Ohwaki, Y.; Sugahara, K. Active extrusion of protons and exudation of carboxylic acids  
114 in response to iron deficiency by roots of chickpea (*Cicer arietinum* L.). *Plant Soil* **1997**,

- 115 189, 49–55.
- 116 (27)Shane, M. W.; Cramer, M. D.; Funayama–Noguchi, S.; Cawthray, G.; Millar, A. H.; Day,  
117 D. A.; Lambers, H. Developmental physiology of cluster–root carboxylate synthesis and  
118 exudation in harsh hakea. Expression of phosphoenolpyruvate carboxylase and the  
119 alternative oxidase. *Plant Physiol.* **2004**, *135*, 549–560.
- 120 (28)Teboh, J. M.; Franzen, D. W. Buckwheat (*Fagopyrum esculentum* Moench) potential to  
121 contribute solubilized soil phosphorus to subsequent crops. *Commun. Soil Sci. Plant Anal.*  
122 **2011**, *42*, 1544–1550.
- 123 (29)Almeida, D. S.; Rosolem, C. A. Ruzigrass grown in rotation with soybean increases soil  
124 labile phosphorus. *Agron. J.* **2016**, *108*, 2444–2452.
- 125 (30)Ullah, A. H. J.; Sethumadhavan, K. PhyA gene product of *Aspergillus ficuum* and  
126 *Peniophora lycii* produces dissimilar phytases. *Biochem. Biophys. Res. Commun.* **2003**,  
127 *303*, 463–468.
- 128 (31)Li, M.; Osaki, M.; Honma, M.; Tadano, T. Purification and characterization of phytase  
129 induced in tomato roots under phosphorus-deficient conditions. *Soil Sci. Plant Nut.* **1997**,  
130 *43*, 179–190.
- 131 (32)Zhang, L. H.; An, L. J.; Gao, X. R.; Wang, Y. J. Properties of *A. ficuum* AS3.324 phytase  
132 expressed in tobacco. *Process Biochem.* **2005**, *40*, 213–216.
- 133 (33)Ullah, A. H. J.; Sethumadhavan, K.; Mullaney, E. J.; Ziegelhoffer, T.; Austin–Phillips, S.  
134 Cloned and expressed fungal *phyA* gene in alfalfa produces a stable phytase. *Biochem.*  
135 *Bioph. Res. Commu.* **2002**, *290*, 1343–1348.
- 136 (34)Hamada, A.; Yamaguchi, K.; Ohnishi, N.; Harada, M.; Nikumar, S.; Honda, H. High-  
137 level production of yeast (*Schwanniomyces occidentalis*) phytase in transgenic rice plants  
138 by a combination of signal sequence and codon modification of the phytase gene. *Plant*  
139 *Biotechnol. J.* **2005**, *3*, 43–55.
- 140 (35)Lassen, S. F.; Breinholt, J.; Ostergaard, P. R.; Brugger, R.; Bischoff, A.; Wyss, M.;  
141 Fuglsang, C. C. Expression, gene cloning, and characterization of five novel phytases  
142 from four basidiomycete fungi: *Peniophora lycii*, *Agrocybe pediades*, a *Ceriporia* sp., and  
143 *Trametes pubescens*. *Appl. Environ. Microb.* **2001**, *67*, 4701–4107.
- 144 (36)Han, Y.; Xin, G. L. Role of glycosylation in the functional expression of an *Aspergillus*  
145 *niger* phytase (*phyA*) in *Pichia pastoris*. *Arch. Biochem. Biophys.* **1999**, *364*, 83–90.
- 146 (37)Peng, R. H.; Yao, Q. H.; Xiong, A. S.; Cheng, Z. M.; Li, Y. Codon-modifications and an  
147 endoplasmic reticulum–targeting sequence additively enhance expression of an  
148 *Aspergillus* phytase gene in transgenic canola. *Plant Cell Rep.* **2006**, *25*, 124–132.
